# Supplementary material for: DDX1 vesicles control calcium-dependent mitochondrial activity in mouse embryos
Source: PubMed Central journal article supplement (PMC9249788; doi:10.1038/s41467-022-31497-9), 2022-07-01
Supplement: 41467_2022_31497_MOESM3_ESM.pdf [file 41467_2022_31497_MOESM3_ESM.pdf]

**Descriptions of Additional Supplementary Data files**

Supplementary Dataset 1. Single embryo mRNA sequencing results.

Supplementary Dataset 2. Primers used for RT-qPCR
